# Supplementary material
Source: Springer Nature journal article supplement (https://www.springermedizin.de/resource/supplementary/12902_2013_311_MOESM4_ESM.pdf/9515910)

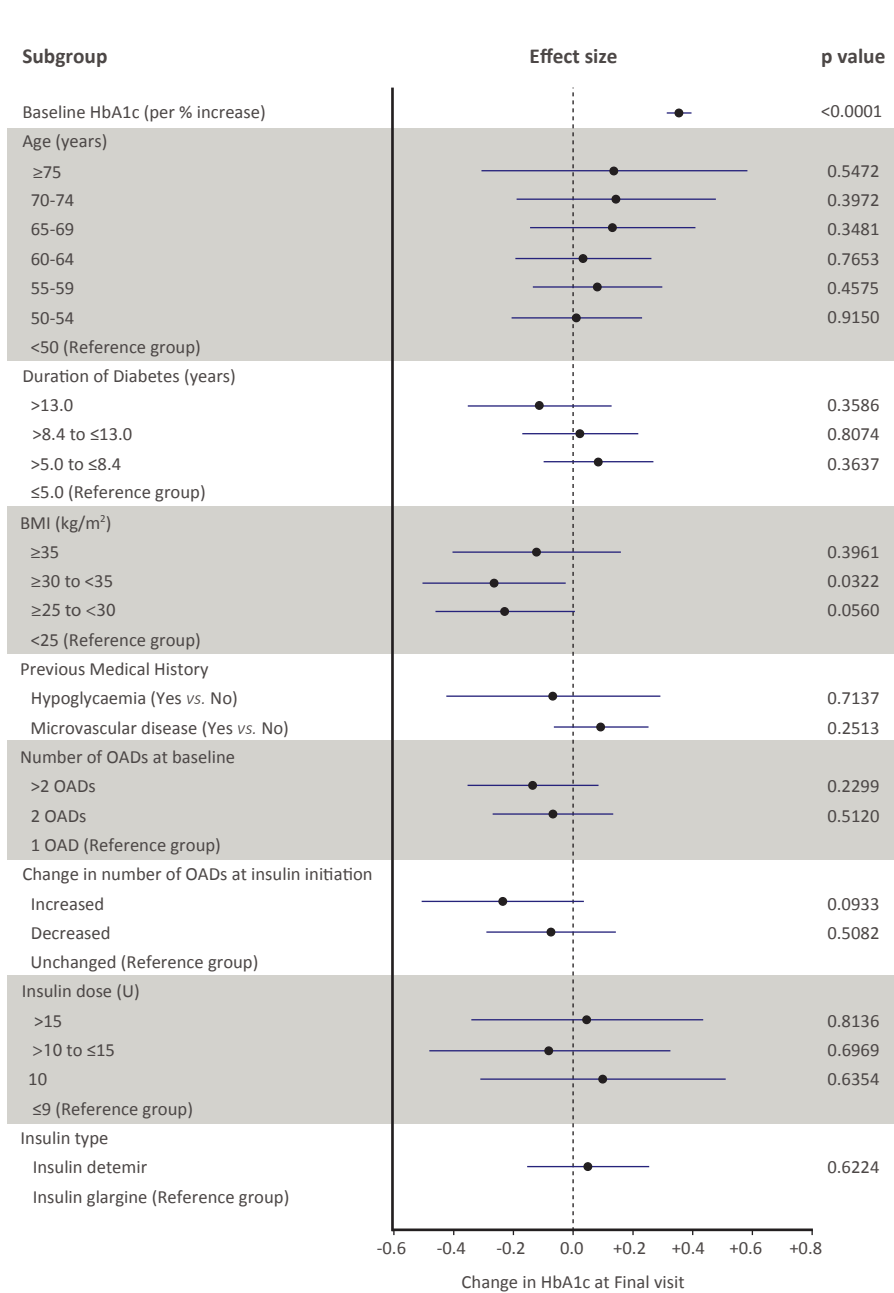

Supplement: MOESM4 [file 9515910]
